# Supplementary material for: Mutation of platelet-derived growth factor receptor β causes and exacerbates the severity of brain arteriovenous malformation through enhancing angiogenesis
Source: Research Square preprint supplement (doi:10.21203/rs.3.rs-7552935/v1), 2025-09-18
Supplement: Supplementary file 1 [file 19f2366f807535581b2887c2.docx]

**Mutation of platelet-derived growth factor receptor** **β causes and exacerbates the severity of brain arteriovenous malformation through enhancing angiogenesis.**

**Running Title:** Mutation of Pdgfrb enhances bAVM severity

Alka Yadav1, Leandro Barbosa Do Prado1, Mustafa Mohamed1, Calvin Wang1, Joshua Shi1, Zahra Shabani1, Rich Liang1, Kelly Press1, Courtney Tom1, Ethan A. Winkler2, Hua Su1

1Center for Cerebrovascular Research, Department of Anesthesia and Perioperative Care, University of California, San Francisco, California, USA.

2Department of Neurosurgery, University of California, San Francisco, California, USA

**Supplementary Figures:**

**
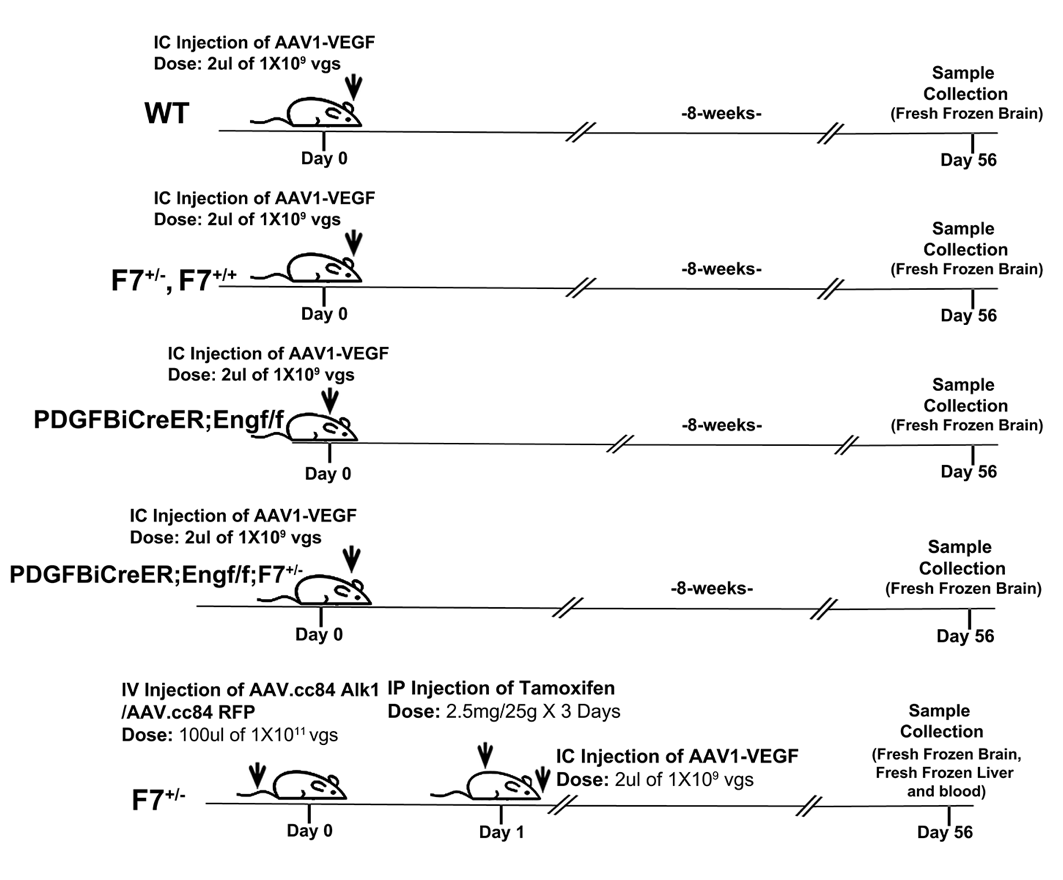
**

**Suppl Fig 1: Timeline for model induction and sample analysis.**


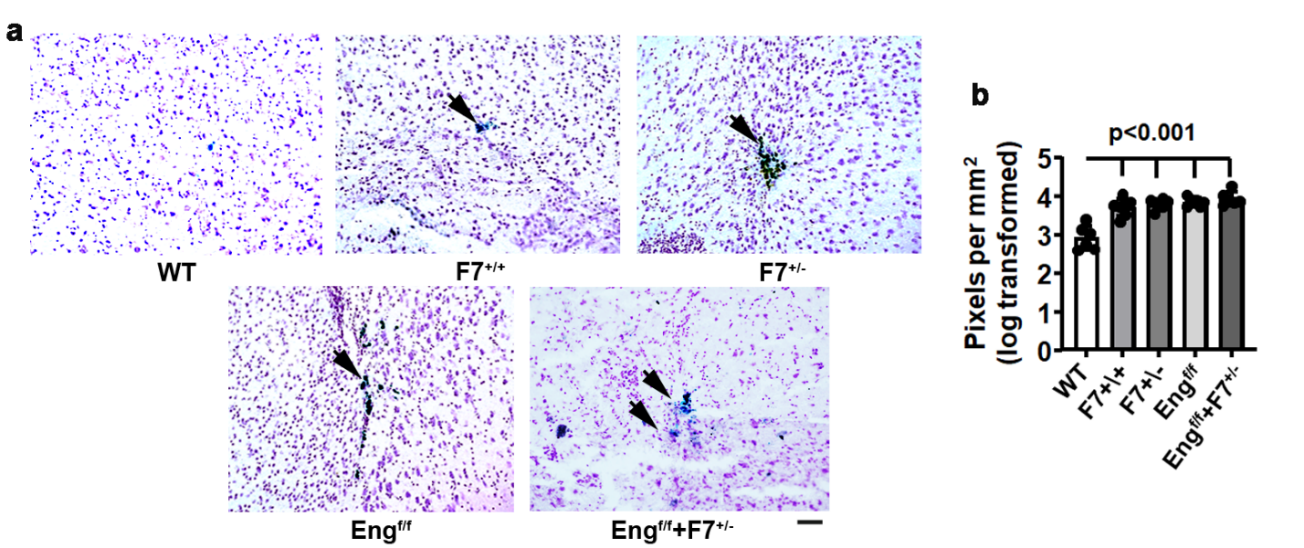


**Suppl Fig 2. *Pdgfrb* and *Eng* mutations cause hemorrhage in the brain. a.** Prussian-stained sections. The arrows indicate the iron-deposited area (hemorrhage). Scale bar: 50 µm. **b.** Quantification of microhemorrhage. n=6-7. F7: *Pdgfrb* F7 mutant mice; Engflf: *Pdgfb*icreER;*Eng*f/f mice; Engflf;F7+/-: *Pdgfb*icreER;*Eng*f/f;F7+/- mice.


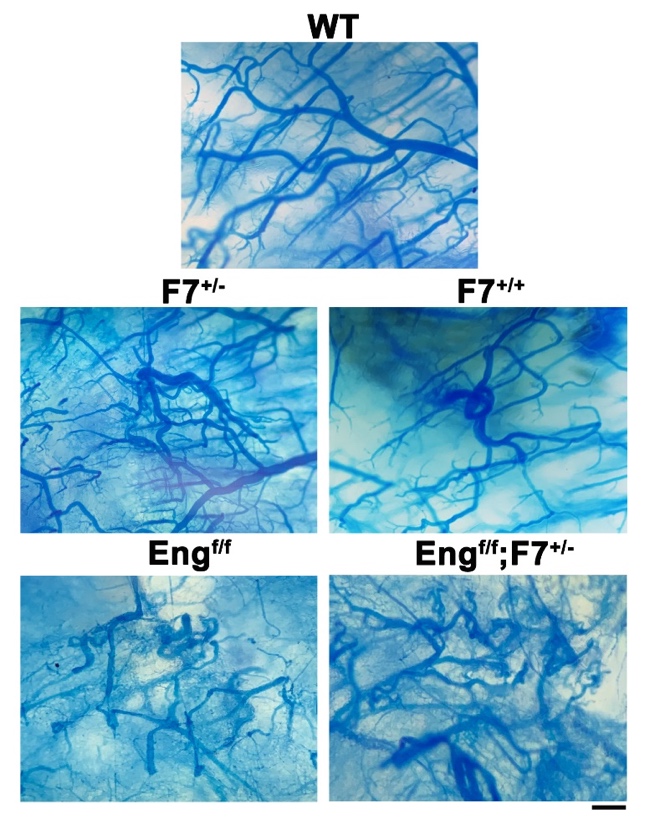


**Suppl Fig 3: Arteriovenous shunts in the brain of *Pdgfrb* (F7) and *Eng* mutant mice.** Brain vessels were cast with latex dye. The particles in the latex dye are too large to pass through a capillary. Latex dye is present in the veins after being injected into the left cardiac ventricle only when in the presence of an arteriovenous (AV) shunt. Scale bar: 500 µm. WT: wild-type mice; F7: *Pdgfrb* F7 mutant mice; Engflf: *Pdgfb*icreER;*Eng*f/f mice; Engflf;F7+/-: *Pdgfb*icreER;*Eng*f/f;F7+/- mice.


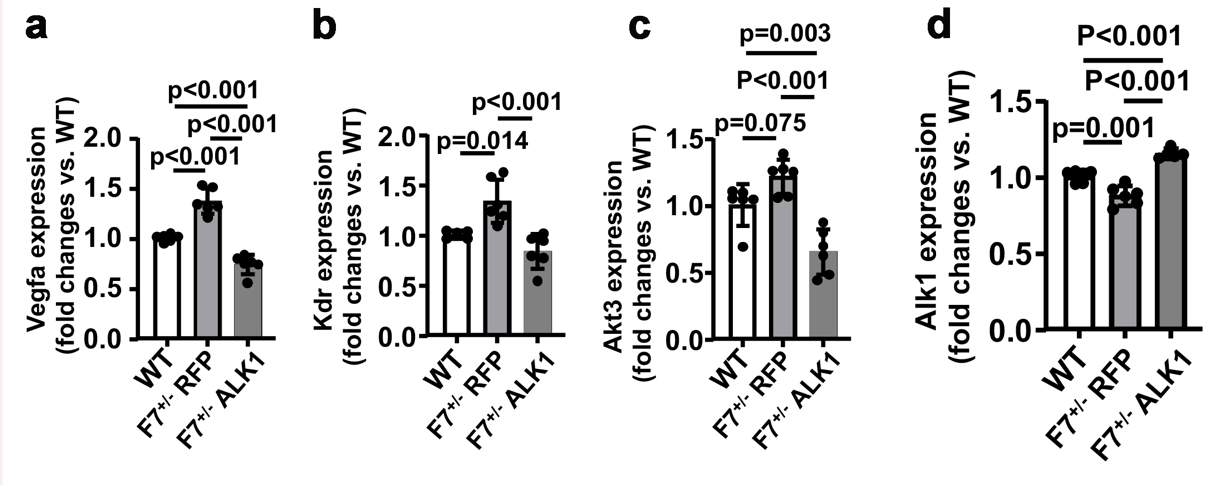


**Suppl Fig 4. *Pdgfrb* F7 mutation upregulated pro-angiogenic gene expression and downregulated Alk1 expression; overexpression of ALK1 in brain endothelial cells reversed the gene expression profiles.** Quantification of Vegfa **(a),** Kdr **(b),** Akt3 **(c)**, and Alk1 **(d)** expression.WT: wild type mice; F7+/- RFP; *Pdgfrb* F7 heterozygous mutation mice treated with AAV.cc84-RFP; F7+/- ALK1: *Pdgfrb* F7 heterozygous mutation mice treated with AAV.cc84-ALK1. N=5-6.

**Supplementary tables:**

| Suppl Table 1. Key differentially expressed genes related to angiogenesis induced by *Pdgfrb* F7 mutation in brain angiogenic region. | | |
| --- | --- | --- |
| Gene | Log2 fold-change | p-value |
| Pdgfb | -0.23 | 0.04 |
| Acvrl1/Alk1 | -0.53 | 0.0003 |
| Eng | -0.27 | 0.015 |
| Id1 | -0.41 | 0.028 |
| Vegfa | 0.61 | 6.66E-06 |
| Akt3 | 0.38 | 0.0006 |
| Tgfb1 | -0.66 | 0.002 |
| Kdr | 0.73 | 0.002 |

| Suppl Table 2. Key differentially expressed genes related to angiogenesis and inflammation upregulated by *Pdgfrb* F7 mutation in the bAVMs *Eng*-deficient mice. | | |
| --- | --- | --- |
| Gene | Log2 fold-change | p-value |
| Klf2*** | 1.6 | 1.10E-18 |
| Eno1*** | 0.6 | 9.44E-09 |
| Ccl28** | 3.0 | 2.40E-09 |
| S100a9** | 3.5 | 3.25E-05 |
| S100a8** | 3.8 | 0.0002 |
| C1qa** | 0.7 | 0.0003 |
| Klf4*** | 1.2 | 3.31E-06 |
| Tmem181** | 1.4 | 0.0070 |
| C3** | 1.7 | 0.0007 |
| Map3k6*** | 1.07 | 0.0070 |
| Tgfb1*** | 0.7 | 0.0002 |
| Ccl25** | 1.0 | 0.0007 |
| Vegfa*** | 0.3 | 0.04 |
| Angpt2*** | 1.1 | 0.04 |
| *** Angiogenesis related genes  ** Inflammation related genes | | |

| **Suppl Table 3. Pro-angiogenic and pro-inflammatory pathways upregulated by *Pdgfrb* F7 mutation in bAVMs of *Eng* mutant mice.** | |
| --- | --- |
| **Pathways** | Adjusted p value |
| Angiogenesis | 0.00027 |
| Adaptive Immune Response | 0.000504 |
| Positive regulation of Cell Motility | 1.02E-06 |
| Positive regulation of inflammatory response | 0.048877 |
